# Supplementary material for: Zinc(ii), iron(ii/iii) and ruthenium(ii) complexes of o-phenylenediamine derivatives: oxidative dehydrogenation and photoluminescence
Source: Royal Society of Chemistry journal article supplement (doi:10.1039/c3dt51771c), 2013-01-01
Supplement: c3dt51771c.pdf [file c3dt51771c.pdf]

Electronic Supporting Information

## Zinc(II), iron(II/III) and ruthenium(II) complexes of *o*-phenylenediamine derivatives: oxidative dehydrogenation and photoluminescence

Satyabrata Chaudhuri,<sup>a</sup> Sarat Chandra Patra,<sup>a</sup> Pinaki Saha,<sup>a</sup> Amit Saha Roy,<sup>a</sup> Suwendu Maity,<sup>a</sup> Sachinath Bera,<sup>a</sup> Pinki Saha Sardar,<sup>b</sup> Sanjib Ghosh,<sup>b</sup> Thomas Weyhermüller<sup>c</sup> and Prasanta Ghosh<sup>\*a</sup>

<sup>†</sup>Department of Chemistry, R. K. Mission Residential College, Narendrapur, Kolkata-700103,  
India

<sup>‡</sup>Department of Chemistry, Presidency University, Kolkata-700073, India.

<sup>§</sup> Max-Planck Institute for Chemical Energy Conversion, Stiftstr. 34-36  
45470 Muelheim an der Ruhr, Germany

\* To whom corresponding should be addressed. Email: ghosh@pghosh.in

Phone: +91-33-2428-7347; Fax: +91-33-2477-3597

| Table of Contents                                                                                                                          |           |          |
|--------------------------------------------------------------------------------------------------------------------------------------------|-----------|----------|
|                                                                                                                                            |           | Page No. |
| Amine-Imine States                                                                                                                         | Chart S1  | S2       |
| $\nu_{N-H}$ and $\nu_{C=N}$ Stretching Frequencies of $L_2H$ , $L_3H_2$ , $L_6H$ and <b>1-4</b> , <b>5<sup>+</sup></b> and <b>6</b>        | Table S1  | S2       |
| <sup>1</sup> H NMR spectra of $L_3H_2$ in $CDCl_3$ with the concentration of $2 \times 10^{-5}M$ (bottom) and $0.6 \times 10^{-5}M$ (top). | Figure S1 | S3       |
| Electronic Absorption Spectra of <b>1-6</b>                                                                                                | Figure S2 | S4       |
| Representative Fluorescence Decay of $L_3H_2$ and Complex <b>2</b>                                                                         | Figure S3 | S5       |
| Gas Phase Optimized Geometries of <b>4</b> , $cis-[Fe^{II}(L_3H)Cl_2]^-$ ( <b>4<sup>-</sup></b> ) and $cis-[Co^{II}(L_3H)Cl_2]^-$          | Figure S4 | S6       |
| Selected Experimental Bond Lengths (Å) and Angles (°) of <b>1</b>                                                                          | Table S2  | S6       |
| Selected Experimental Bond Lengths (Å) and Angles (°) of <b>2</b>                                                                          | Table S3  | S7       |
| Selected Experimental Bond Lengths (Å) and Angles (°) of <b>3</b>                                                                          | Table S4  | S7       |
| Selected Experimental Bond Lengths (Å) and Angles (°) of <b>4</b>                                                                          | Table S5  | S8       |
| Selected Experimental Bond Lengths (Å) and Angles (°) of <b>5<sup>+</sup></b>                                                              | Table S6  | S8       |
| Selected Experimental Bond Lengths (Å) and Angles (°) of <b>6</b>                                                                          | Table S7  | S9       |
| Singlet State Lifetime Data of $L_3H_2$ , <b>2</b> and $[L_3H_2 + Al^{III}]$ (1:1) Mixtures at 298 K                                       | Table S8  | S10      |
| Gas Phase Optimized Coordinates of $L_3H_2$                                                                                                | Table S9  | S11      |
| Gas Phase Optimized Coordinates of <b>4</b>                                                                                                | Table S10 | S13      |
| Gas Phase Optimized Coordinates of <b>4<sup>-</sup></b>                                                                                    | Table S11 | S16      |
| Gas Phase Optimized Coordinates of $cis-[Co^{II}(L^1)Cl_2]^-$                                                                              | Table S12 | S18      |

**Chart S1**

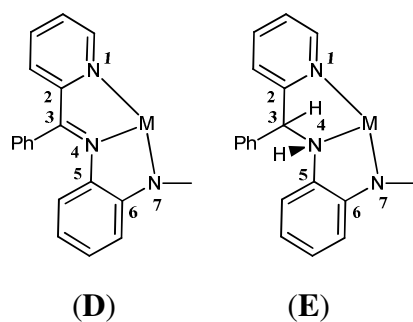

**Table S1**  $\nu_{\text{N-H}}$  and  $\nu_{\text{C=N}}$  Stretching Frequencies of  $\text{L}_2\text{H}$ ,  $\text{L}_3\text{H}_2$ ,  $\text{L}_6\text{H}$  and **1-4**,  $5^+\text{PF}_6^-$  and **6**

| Substrate              | $\nu_{\text{N-H}}$ ( $\text{cm}^{-1}$ ) | $\nu_{\text{C=N}}$ ( $\text{cm}^{-1}$ )   |
|------------------------|-----------------------------------------|-------------------------------------------|
| $\text{L}_2\text{H}$   | 3378, 3232, 3327                        | 1591, 1507                                |
| $\text{L}_3\text{H}_2$ | 3422, 3254                              | 1593, 1509                                |
| $\text{L}_5\text{H}_3$ | 3394, 3305, 3246                        | 1585, 1508                                |
| $\text{L}_6\text{H}$   | 3300, 3294                              | 1594, 1503                                |
| <b>1</b>               | ... ..                                  | 1595, 1488                                |
| <b>2</b>               | ... ..                                  | 1595, 1488                                |
| <b>3</b>               | 3448                                    | 1596, 1559, 1543, 1508, 1479              |
| <b>4</b>               | 3176                                    | 1580, 1541                                |
| $5^+\text{PF}_6^-$     | ... ..                                  | 1603, 1570, 1521, 840 ( $\text{PF}_6^-$ ) |
| <b>6</b>               | ... ..                                  | 1600, 1577, 1518                          |

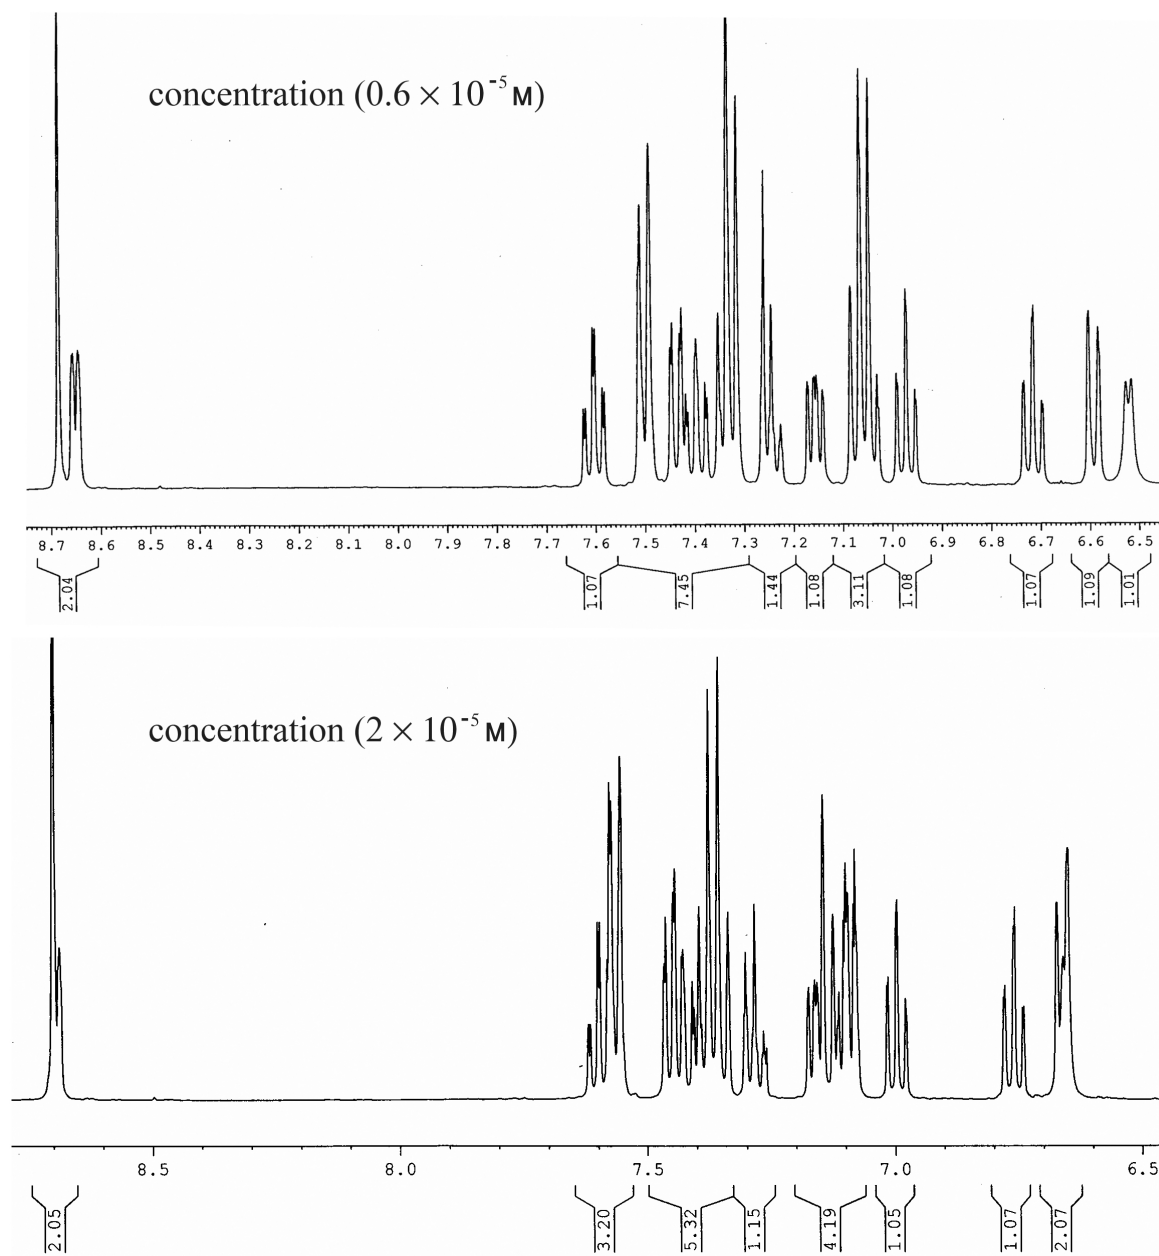

**Fig. S1**  $^1\text{H}$  NMR spectra (6.5-8.8  $\delta/\text{ppm}$ ) of  $\text{L}_3\text{H}_2$  in  $\text{CDCl}_3$  with the concentration of  $2 \times 10^{-5} \text{ M}$  (bottom) and  $0.6 \times 10^{-5} \text{ M}$  (top)

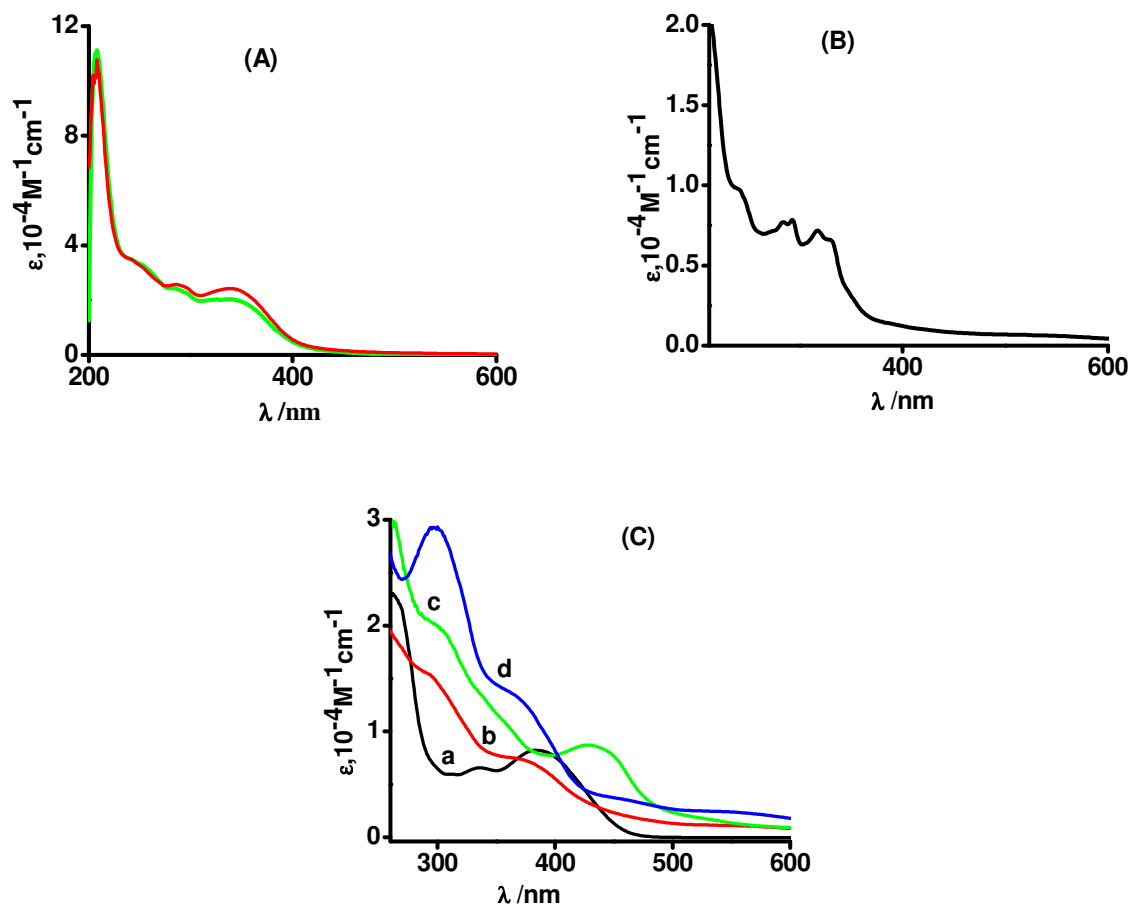

**Fig. S2** Absorption spectra of (A) **1** (green) and **2** (red) (B) **4** and (C) comparative UV-vis spectra of (a)  $\text{L}_3\text{H}_2$ , (b) **4** (c)  $[\text{L}_3\text{H}_2 + \text{Co}^{\text{II}}]$  (1:1) and (d)  $[\text{L}_3\text{H}_2 + \text{Fe}^{\text{II}}]$  (1:1) mixtures in MeOH at 298 K.

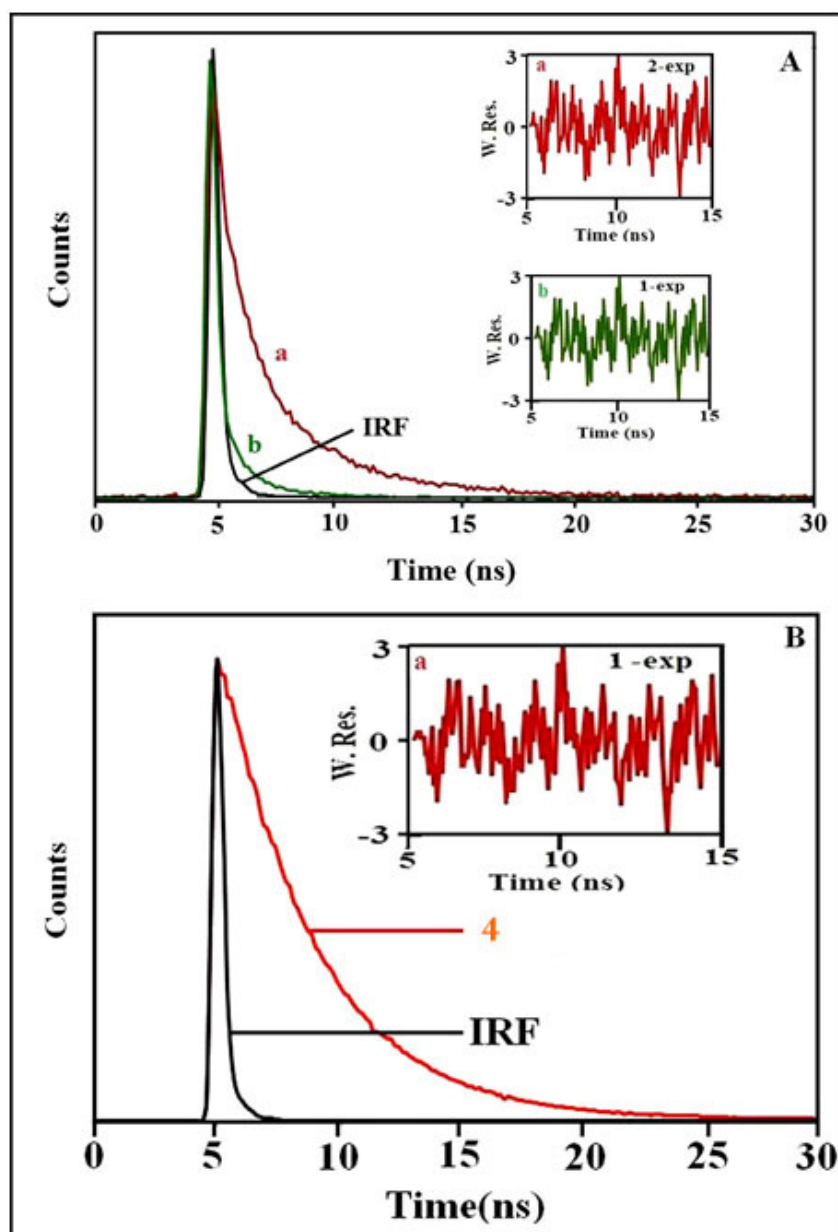

**Fig. S3** (A) Representative fluorescence decay of L<sub>3</sub>H<sub>2</sub> ( $0.4 \times 10^{-4}$  M) in CH<sub>3</sub>OH at 298 K (a)  $\lambda_{\text{monitored}} = 470$  nm, (b)  $\lambda_{\text{monitored}} = 525$  nm;  $\lambda_{\text{ex}} = 290$  nm (LED); excitation band-pass = 20 nm, emission band-pass = 15 nm. (B) Representative fluorescence decay of (a) **4** complex,  $\lambda_{\text{monitored}} = 450$  nm in CH<sub>3</sub>OH at 298 K.  $\lambda_{\text{ex}} = 290$  nm (LED); excitation band-pass = 20 nm, emission band-pass = 15 nm.

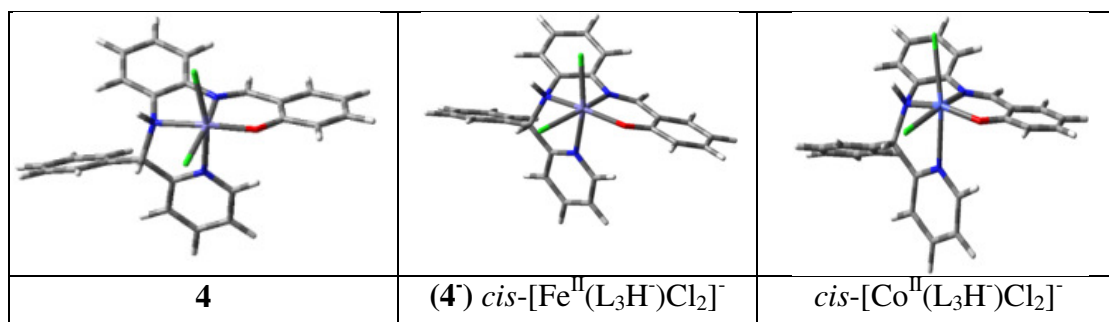

**Fig. S4** Gas phase optimized geometries of **4**: (Fe-O(1), 1.914; Fe-N(9), 2.215; Fe-N(16), 2.265; Fe-N(29), 2.293, Fe-Cl(1), 2.311; Fe-Cl(2), 2.324 Å); *cis*-[Fe<sup>II</sup>(L<sub>3</sub>H)Cl<sub>2</sub>]<sup>-</sup> (**4\***): (Fe-O(1), 2.037; Fe-N(9), 2.262; Fe-N(16), 2.314; Fe-N(29), 2.348, Fe-Cl(1), 2.453; Fe-Cl(2), 2.489 Å) and *cis*-[Co<sup>II</sup>(L<sub>3</sub>H)Cl<sub>2</sub>]<sup>-</sup>: (Co-O(1), 2.039; Co-N(9), 2.236; Co-N(16), 2.284; Co-N(29), 2.348, Co-Cl(1), 2.416; Co-Cl(2), 2.450 Å).

**Table S2** Selected experimental bond lengths (Å) and angles (°) of **1**

|             |            |                   |             |
|-------------|------------|-------------------|-------------|
| Zn(1)-N(2)  | 2.1463(14) | N(2)-Zn(1)-N(1)   | 74.08(5)    |
| Zn(1)-N(1)  | 2.1672(16) | N(2)-Zn(1)-N(3)   | 73.69(6)    |
| Zn(1)-N(3)  | 2.2102(16) | N(1)-Zn(1)-N(3)   | 138.84(6)   |
| Zn(1)-Cl(2) | 2.2449(5)  | N(2)-Zn(1)-Cl(2)  | 104.63(4)   |
| Zn(1)-Cl(1) | 2.2770(5)  | N(1)-Zn(1)-Cl(2)  | 109.01(5)   |
| N(3)-C(14)  | 1.422(2)   | N(3)-Zn(1)-Cl(2)  | 103.38(5)   |
| C(13)-C(14) | 1.397(3)   | N(2)-Zn(1)-Cl(1)  | 142.99(4)   |
| N(2)-C(13)  | 1.402(2)   | N(1)-Zn(1)-Cl(1)  | 94.10(4)    |
| N(2)-C(6)   | 1.275(2)   | N(3)-Zn(1)-Cl(1)  | 96.45(4)    |
| C(5)-C(6)   | 1.486(2)   | Cl(2)-Zn(1)-Cl(1) | 112.369(19) |
| C(6)-C(7)   | 1.486(2)   |                   |             |
| N(1)-C(5)   | 1.345(2)   |                   |             |

**Table S3** Selected experimental bond lengths (Å) and angles (°) of **2**

|             |           |                   |             |
|-------------|-----------|-------------------|-------------|
| Zn(1)-N(2)  | 2.158(2)  | N(2)-Zn(1)-N(1)   | 74.23(9)    |
| Zn(1)-N(1)  | 2.158(3)  | N(2)-Zn(1)-N(3)   | 73.85(9)    |
| Zn(1)-N(3)  | 2.199(3)  | N(1)-Zn(1)-N(3)   | 138.91(10)  |
| Zn(1)-Br(2) | 2.3843(6) | N(2)-Zn(1)-Br(2)  | 103.78(7)   |
| Zn(1)-Br(1) | 2.4353(5) | N(1)-Zn(1)-Br(2)  | 108.84(8)   |
| N(3)-C(14)  | 1.434(4)  | N(3)-Zn(1)-Br(2)  | 103.36(8)   |
| C(13)-C(14) | 1.397(4)  | N(2)-Zn(1)-Br(1)  | 145.96(7)   |
| N(2)-C(13)  | 1.408(4)  | N(1)-Zn(1)-Br(1)  | 96.04(7)    |
| N(2)-C(6)   | 1.282(4)  | N(3)-Zn(1)-Br(1)  | 96.10(7)    |
| C(5)-C(6)   | 1.481(4)  | Br(2)-Zn(1)-Br(1) | 110.205(18) |
| C(6)-C(7)   | 1.493(4)  |                   |             |
| N(1)-C(5)   | 1.356(4)  |                   |             |

**Table S4** Selected experimental bond lengths (Å) and angles (°) of **3**

|             |           |                   |            |
|-------------|-----------|-------------------|------------|
| Ru(1)-N(8)  | 1.963(2)  | N(1)-Ru(1)-N(15)  | 160.37(10) |
| Ru(1)-N(1)  | 2.028(3)  | N(8)-Ru(1)-P(30)  | 95.06(8)   |
| Ru(1)-N(15) | 2.138(3)  | N(1)-Ru(1)-P(30)  | 93.87(7)   |
| Ru(1)-P(30) | 2.2846(8) | N(15)-Ru(1)-P(30) | 94.96(8)   |
| Ru(1)-C(12) | 2.4345(8) | N(8)-Ru(1)-C(12)  | 172.42(8)  |
| Ru(1)-C(11) | 2.4555(8) | N(1)-Ru(1)-C(12)  | 97.76(7)   |
| N(1)-C(6)   | 1.381(4)  | N(15)-Ru(1)-C(12) | 99.35(8)   |
| C(6)-C(7)   | 1.455(4)  | P(30)-Ru(1)-C(12) | 92.39(3)   |
| C(7)-C(16)  | 1.489(4)  | N(8)-Ru(1)-C(11)  | 85.37(8)   |
| C(7)-N(8)   | 1.316(4)  | N(1)-Ru(1)-C(11)  | 87.15(7)   |
| N(8)-C(9)   | 1.426(4)  | N(15)-Ru(1)-C(11) | 84.16(7)   |
| C(9)-C(14)  | 1.399(5)  | P(30)-Ru(1)-C(11) | 178.94(3)  |
| C(14)-N(15) | 1.455(4)  | C(12)-Ru(1)-C(11) | 87.20(3)   |
|             |           | N(8)-Ru(1)-N(15)  | 81.39(11)  |

**Table S5** Selected experimental and calculated bond lengths (Å) and angles (°) of **4**

|             | exptl      | calcd  |                   | exptl      | calcd  |
|-------------|------------|--------|-------------------|------------|--------|
| Fe(1)-O(1)  | 1.8923(12) | 1.9144 | C(17)-C(18)       | 1.525(2)   | 1.525  |
| Fe(1)-N(9)  | 2.1403(15) | 2.2147 | C(18)-N(23)       | 1.343(2)   | 1.343  |
| Fe(1)-N(16) | 2.1923(14) | 2.2649 | O(1)-Fe(1)-N(9)   | 86.71(6)   | 86.09  |
| Fe(1)-N(23) | 2.1784(14) | 2.2935 | N(9)-Fe(1)-N(16)  | 77.48(5)   | 75.57  |
| Fe(1)-Cl(1) | 2.2990(5)  | 2.3113 | N(23)-Fe(1)-N(16) | 76.18(5)   | 73.28  |
| Fe(1)-Cl(2) | 2.3357(6)  | 2.3242 | N(16)-Fe(1)-Cl(2) | 96.12(4)   | 91.43  |
| O(1)-C(2)   | 1.325(2)   | 1.3061 | Cl(1)-Fe(1)-Cl(2) | 94.13(2)   | 100.01 |
| C(2)-C(7)   | 1.413(3)   | 1.435  | O(1)-Fe(1)-Cl(1)  | 103.33(4)  | 105.09 |
| C(7)-C(8)   | 1.435(3)   | 1.437  | N(9)-Fe(1)-Cl(1)  | 92.81(4)   | 89.82  |
| C(8)-N(9)   | 1.298(2)   | 1.299  | N(16)-Fe(1)-Cl(1) | 88.45(4)   | 88.46  |
| N(9)-C(10)  | 1.419(2)   | 1.410  | N(23)-Fe(1)-Cl(2) | 85.82(4)   | 86.23  |
| C(10)-C(15) | 1.389(2)   | 1.411  | N(9)-C(8)-C(7)    | 125.16(18) | 126.66 |
| C(15)-N(16) | 1.460(2)   | 1.450  | N(16)-C(17)-C(18) | 110.02(13) | 110.32 |
| N(16)-C(17) | 1.513(2)   | 1.509  |                   |            |        |

**Table S6.** Selected experimental bond lengths (Å) and angles (°) of **5**

|             |            |                   |             |
|-------------|------------|-------------------|-------------|
| Ru(1)-N(16) | 1.9758(12) | N(16)-Ru(1)-N(9)  | 84.15(5)    |
| Ru(1)-N(9)  | 2.0059(12) | N(16)-Ru(1)-O(1)  | 176.35(5)   |
| Ru(1)-O(1)  | 2.0730(11) | N(9)-Ru(1)-O(1)   | 92.20(5)    |
| Ru(1)-N(23) | 2.0833(12) | N(16)-Ru(1)-N(23) | 79.67(5)    |
| Ru(1)-P(30) | 2.4170(3)  | N(9)-Ru(1)-N(23)  | 163.82(5)   |
| Ru(1)-P(30) | 2.4171(3)  | O(1)-Ru(1)-N(23)  | 103.98(4)   |
| O(1)-C(2)   | 1.3036(18) | N(16)-Ru(1)-P(30) | 92.945(7)   |
| C(2)-C(3)   | 1.413(3)   | N(9)-Ru(1)-P(30)  | 89.424(7)   |
| C(7)-C(8)   | 1.434(2)   | O(10)-Ru(1)-P(30) | 87.005(7)   |
| C(8)-N(9)   | 1.3053(18) | N(23)-Ru(1)-P(30) | 91.394(7)   |
| N(9)-C(10)  | 1.4267(19) | N(16)-Ru(1)-P(30) | 92.945(6)   |
| C(10)-C(15) | 1.417(2)   | N(9)-Ru(1)-P(30)  | 89.425(7)   |
| C(15)-N(16) | 1.4375(18) | O(1)-Ru(1)-P(30)  | 87.004(7)   |
| N(16)-C(17) | 1.3126(18) | N(23)-Ru(1)-P(30) | 91.393(7)   |
| C(17)-C(18) | 1.4645(19) | P(30)-Ru(1)-P(30) | 173.852(13) |
| C(17)-C(24) | 1.487(2)   |                   |             |
| C(18)-N(23) | 1.3732(18) |                   |             |



**Table S7** Selected experimental bond lengths (Å) and angles (°) of **6**

|             |            |                   |             |
|-------------|------------|-------------------|-------------|
| Ru(1)-N(8)  | 1.9644(11) | N(8)-Ru(1)-N(15)  | 82.30(5)    |
| Ru(1)-N(15) | 2.0423(11) | N(8)-Ru(1)-N(1)   | 79.35(5)    |
| Ru(1)-N(1)  | 2.0554(11) | N(15)-Ru(1)-N(1)  | 159.03(5)   |
| Ru(1)-P(30) | 2.2952(4)  | N(8)-Ru(1)-P(30)  | 95.52(3)    |
| Ru(1)-C(12) | 2.4357(4)  | N(15)-Ru(1)-P(30) | 96.03(3)    |
| Ru(1)-C(11) | 2.4726(4)  | N(1)-Ru(1)-P(30)  | 95.75(3)    |
| C(16)-C(17) | 1.4741(18) | N(8)-Ru(1)-C(12)  | 73.95(3)    |
| N(15)-C(16) | 1.2910(17) | N(15)-Ru(1)-C(12) | 94.22(3)    |
| C(14)-N(15) | 1.4288(17) | N(1)-Ru(1)-C(12)  | 103.12(3)   |
| C(9)-C(14)  | 1.4046(19) | P(30)-Ru(1)-C(12) | 89.750(14)  |
| N(8)-C(9)   | 1.4236(16) | N(8)-Ru(1)-C(11)  | 85.01(3)    |
| C(7)-N(8)   | 1.3115(17) | N(15)-Ru(1)-C(11) | 83.64(3)    |
| C(6)-C(7)   | 1.4656(18) | N(1)-Ru(1)-C(11)  | 84.74(3)    |
| C(7)-C(23)  | 1.4809(18) | P(30)-Ru(1)-C(11) | 179.333(13) |
| N(1)-C(6)   | 1.3732(17) | C(12)-Ru(1)-C(11) | 89.695(13)  |

**Table S8** Singlet state lifetime data of L<sub>3</sub>H<sub>2</sub>, **4** and [L<sub>3</sub>H<sub>2</sub> + Al<sup>III</sup>] (1:1) mixtures at 298 K

| Substrate (solvent)                                                          | Concentration             | $\lambda_{\text{exc}}$<br>(nm) | $\lambda_{\text{max}}$<br>(nm) | $\tau_1$<br>(ns) | $\tau_2$<br>(ns) | $\chi^2$ | $\tau_{\text{av}}$<br>(ns) |
|------------------------------------------------------------------------------|---------------------------|--------------------------------|--------------------------------|------------------|------------------|----------|----------------------------|
| L <sub>3</sub> H <sub>2</sub> (CH <sub>3</sub> OH)                           | 0.01 × 10 <sup>-4</sup> M | 290                            | 470                            | 3.8 (57.8%)      | 1.2 (42.2%)      | 0.872    | 2.6                        |
|                                                                              | 0.15 × 10 <sup>-4</sup> M | 290                            | 470                            | 3.7 (45.5%)      | 1.2 (54.5%)      | 1.095    | 2.3                        |
|                                                                              |                           |                                | 525                            | 3.7 (3.8%)       | 1.1 (96.2%)      | 0.956    | 1.2                        |
|                                                                              | 0.2 × 10 <sup>-4</sup> M  | 290                            | 470                            | 3.7 (32.4%)      | 1.1 (67.6%)      | 0.971    | 1.9                        |
|                                                                              |                           |                                | 525                            | 3.7 (6.2%)       | 1.1 (93.8%)      | 1.301    | 1.3                        |
|                                                                              | 0.4 × 10 <sup>-4</sup> M  | 290                            | 470                            | 3.7 (27.2%)      | 1.0 (72.8%)      | 0.828    | 1.8                        |
|                                                                              |                           |                                | 525                            | 3.7 (6.6%)       | 1.1 (93.4%)      | 1.055    | 1.3                        |
|                                                                              |                           | 405                            | 525                            | 1.1 (100%)       | -                | 0.933    | -                          |
|                                                                              | 0.6 × 10 <sup>-4</sup> M  | 290                            | 470                            | 3.7 (20.1%)      | 1.1 (79.9%)      | 0.982    | 1.6                        |
|                                                                              | 0.8 × 10 <sup>-4</sup> M  | 290                            | 470                            | 3.8 (15.5%)      | 1.1 (84.5%)      | 0.817    | 1.5                        |
|                                                                              |                           |                                | 525                            | 3.7 (2.2%)       | 1.1 (97.8%)      | 0.828    | 1.2                        |
|                                                                              |                           | 405                            | 525                            | 1.1 (100%)       | -                | 1.033    | -                          |
| L <sub>3</sub> H <sub>2</sub> (DMSO)                                         | 0.4 × 10 <sup>-4</sup> M  | 290                            | 480                            | 3.7 (26.4%)      | 1.1 (73.6%)      | 1.242    | 1.8                        |
|                                                                              |                           | 525                            | 3.7 (4.7%)                     | 1.1 (95.3%)      | 1.215            | 1.2      |                            |
|                                                                              |                           | 405                            | 525                            | 1.1 (100%)       | -                | 0.890    | -                          |
| L <sub>3</sub> H <sub>2</sub> (CH <sub>2</sub> Cl <sub>2</sub> )             | 0.4 × 10 <sup>-4</sup> M  | 290                            | 470                            | 3.7 (90.0%)      | 1.1 (10.0%)      | 0.956    | 3.4                        |
| <b>4</b> (CH <sub>3</sub> OH)                                                | 0.1 × 10 <sup>-4</sup> M  | 290                            | 450                            | 3.7 (100%)       | -                | 1.101    | -                          |
| [L <sub>3</sub> H <sub>2</sub> + Al <sup>III</sup> ]<br>(CH <sub>3</sub> OH) | 0.1 × 10 <sup>-4</sup> M  | 290                            | 450                            | 3.7 (100%)       | -                | 1.203    | -                          |

**Table S9** Gas phase optimized coordinates of L<sub>3</sub>H<sub>2</sub>

| -----  |        |        |                         |          |           |
|--------|--------|--------|-------------------------|----------|-----------|
| Center | Atomic | Atomic | Coordinates (Angstroms) |          |           |
| Number | Number | Type   | X                       | Y        | Z         |
| -----  |        |        |                         |          |           |
| 1      | 8      | 0      | 5.257478                | 2.900391 | 14.048259 |
| 2      | 6      | 0      | 5.995210                | 3.984406 | 14.361779 |
| 3      | 6      | 0      | 6.102789                | 4.350090 | 15.711714 |
| 4      | 6      | 0      | 6.857546                | 5.460592 | 16.077970 |
| 5      | 6      | 0      | 7.519894                | 6.234088 | 15.110354 |
| 6      | 6      | 0      | 7.413864                | 5.877535 | 13.772242 |
| 7      | 6      | 0      | 6.659014                | 4.756851 | 13.367648 |
| 8      | 6      | 0      | 6.568682                | 4.421578 | 11.957319 |
| 9      | 7      | 0      | 5.921627                | 3.386713 | 11.532517 |
| 10     | 6      | 0      | 5.738640                | 3.140345 | 10.158765 |
| 11     | 6      | 0      | 5.399685                | 4.177963 | 9.272541  |
| 12     | 6      | 0      | 5.065329                | 3.923992 | 7.943156  |
| 13     | 6      | 0      | 5.064420                | 2.604387 | 7.481901  |
| 14     | 6      | 0      | 5.424148                | 1.567278 | 8.340957  |
| 15     | 6      | 0      | 5.770999                | 1.802152 | 9.684540  |
| 16     | 7      | 0      | 6.079944                | 0.717425 | 10.519335 |
| 17     | 6      | 0      | 7.263423                | 0.672014 | 11.400536 |
| 18     | 6      | 0      | 8.602547                | 0.922569 | 10.701942 |

|    |   |   |           |           |           |
|----|---|---|-----------|-----------|-----------|
| 19 | 6 | 0 | 8.836321  | 0.622360  | 9.353507  |
| 20 | 6 | 0 | 10.100923 | 0.864474  | 8.814379  |
| 21 | 6 | 0 | 11.092516 | 1.402306  | 9.635271  |
| 22 | 6 | 0 | 10.762672 | 1.679443  | 10.965013 |
| 23 | 7 | 0 | 9.553458  | 1.452720  | 11.489703 |
| 24 | 6 | 0 | 7.228459  | -0.654174 | 12.160862 |
| 25 | 6 | 0 | 7.816522  | -1.820400 | 11.653093 |
| 26 | 6 | 0 | 7.713427  | -3.031173 | 12.346482 |
| 27 | 6 | 0 | 7.026325  | -3.087208 | 13.561404 |
| 28 | 6 | 0 | 6.442797  | -1.926015 | 14.079094 |
| 29 | 6 | 0 | 6.543167  | -0.719603 | 13.383129 |
| 30 | 1 | 0 | 5.586779  | 3.746434  | 16.452322 |
| 31 | 1 | 0 | 6.932786  | 5.729243  | 17.128741 |
| 32 | 1 | 0 | 8.106873  | 7.099110  | 15.404405 |
| 33 | 1 | 0 | 7.919883  | 6.465439  | 13.008843 |
| 34 | 1 | 0 | 7.088852  | 5.089325  | 11.257193 |
| 35 | 1 | 0 | 5.333894  | 5.190624  | 9.661580  |
| 36 | 1 | 0 | 4.782738  | 4.741924  | 7.286462  |
| 37 | 1 | 0 | 4.790888  | 2.380463  | 6.454057  |
| 38 | 1 | 0 | 5.439565  | 0.543402  | 7.970478  |
| 39 | 1 | 0 | 5.911596  | -0.175145 | 10.067402 |
| 40 | 1 | 0 | 7.167749  | 1.469310  | 12.137239 |
| 41 | 1 | 0 | 8.041548  | 0.220748  | 8.733476  |

|    |   |   |           |           |           |
|----|---|---|-----------|-----------|-----------|
| 42 | 1 | 0 | 10.304884 | 0.640327  | 7.770252  |
| 43 | 1 | 0 | 12.090414 | 1.609964  | 9.259580  |
| 44 | 1 | 0 | 11.501209 | 2.108087  | 11.640810 |
| 45 | 1 | 0 | 8.373760  | -1.786922 | 10.720216 |
| 46 | 1 | 0 | 8.178916  | -3.926023 | 11.940502 |
| 47 | 1 | 0 | 6.950918  | -4.026182 | 14.104130 |
| 48 | 1 | 0 | 5.911669  | -1.958049 | 15.027150 |
| 49 | 1 | 0 | 6.087142  | 0.180132  | 13.789304 |
| 50 | 1 | 0 | 5.278162  | 2.794723  | 13.055460 |

**Table S10** Gas phase optimized coordinates of *cis*-[Fe<sup>III</sup>(L<sub>3</sub>H)Cl<sub>2</sub>] (**4**)

-----

| Center | Atomic | Atomic | Coordinates (Angstroms) |          |           |
|--------|--------|--------|-------------------------|----------|-----------|
| Number | Number | Type   | X                       | Y        | Z         |
| 1      | 26     | 0      | 6.032020                | 2.537080 | 13.626754 |
| 2      | 17     | 0      | 3.749084                | 2.878609 | 13.508123 |
| 3      | 17     | 0      | 6.128646                | 1.072087 | 15.428642 |
| 4      | 8      | 0      | 6.744655                | 4.169558 | 14.328250 |
| 5      | 6      | 0      | 7.112270                | 5.324219 | 13.840659 |
| 6      | 6      | 0      | 7.488890                | 6.359469 | 14.735381 |
| 7      | 6      | 0      | 7.932631                | 7.585761 | 14.266693 |
| 8      | 6      | 0      | 8.024463                | 7.844776 | 12.883601 |

-----

|    |   |   |           |           |           |
|----|---|---|-----------|-----------|-----------|
| 9  | 6 | 0 | 7.652127  | 6.854621  | 11.991723 |
| 10 | 6 | 0 | 7.185166  | 5.590008  | 12.432364 |
| 11 | 6 | 0 | 6.767268  | 4.650162  | 11.427869 |
| 12 | 7 | 0 | 6.268334  | 3.468167  | 11.631220 |
| 13 | 6 | 0 | 5.749896  | 2.690791  | 10.574745 |
| 14 | 6 | 0 | 5.384505  | 3.208538  | 9.317925  |
| 15 | 6 | 0 | 4.761632  | 2.403937  | 8.367289  |
| 16 | 6 | 0 | 4.461704  | 1.070592  | 8.660820  |
| 17 | 6 | 0 | 4.812323  | 0.546654  | 9.904920  |
| 18 | 6 | 0 | 5.472497  | 1.335180  | 10.851918 |
| 19 | 7 | 0 | 5.789287  | 0.819459  | 12.170373 |
| 20 | 6 | 0 | 6.933308  | -0.150180 | 12.341607 |
| 21 | 6 | 0 | 8.247093  | 0.605770  | 12.516049 |
| 22 | 6 | 0 | 9.496781  | 0.045201  | 12.231389 |
| 23 | 6 | 0 | 10.651462 | 0.752380  | 12.567971 |
| 24 | 6 | 0 | 10.531280 | 1.995402  | 13.188621 |
| 25 | 6 | 0 | 9.251415  | 2.482038  | 13.445713 |
| 26 | 7 | 0 | 8.143832  | 1.804860  | 13.112710 |
| 27 | 6 | 0 | 6.964953  | -1.305841 | 11.354290 |
| 28 | 6 | 0 | 7.480945  | -1.178976 | 10.054497 |
| 29 | 6 | 0 | 7.474010  | -2.264458 | 9.175983  |
| 30 | 6 | 0 | 6.947395  | -3.495393 | 9.581641  |
| 31 | 6 | 0 | 6.430735  | -3.634559 | 10.872358 |

|    |   |   |           |           |           |
|----|---|---|-----------|-----------|-----------|
| 32 | 6 | 0 | 6.442887  | -2.546316 | 11.750151 |
| 33 | 1 | 0 | 7.414905  | 6.151046  | 15.798447 |
| 34 | 1 | 0 | 8.212932  | 8.358594  | 14.978649 |
| 35 | 1 | 0 | 8.373652  | 8.808378  | 12.525038 |
| 36 | 1 | 0 | 7.703701  | 7.042928  | 10.920697 |
| 37 | 1 | 0 | 6.882805  | 5.008600  | 10.399864 |
| 38 | 1 | 0 | 5.531456  | 4.260591  | 9.097908  |
| 39 | 1 | 0 | 4.475444  | 2.831152  | 7.409894  |
| 40 | 1 | 0 | 3.944864  | 0.448629  | 7.935647  |
| 41 | 1 | 0 | 4.566733  | -0.481889 | 10.149401 |
| 42 | 1 | 0 | 4.953628  | 0.382598  | 12.560867 |
| 43 | 1 | 0 | 6.732796  | -0.569084 | 13.335808 |
| 44 | 1 | 0 | 9.564011  | -0.930634 | 11.764981 |
| 45 | 1 | 0 | 11.630182 | 0.330792  | 12.354996 |
| 46 | 1 | 0 | 11.402451 | 2.574991  | 13.477228 |
| 47 | 1 | 0 | 9.092043  | 3.431471  | 13.945071 |
| 48 | 1 | 0 | 7.889355  | -0.227819 | 9.724168  |
| 49 | 1 | 0 | 7.876877  | -2.147615 | 8.173165  |
| 50 | 1 | 0 | 6.943829  | -4.339786 | 8.897298  |
| 51 | 1 | 0 | 6.024129  | -4.587794 | 11.199715 |
| 52 | 1 | 0 | 6.046714  | -2.663746 | 12.756912 |

**Table S11** Gas phase optimized coordinates of *cis*-[Fe<sup>II</sup>(L<sub>3</sub>H<sup>-</sup>)Cl<sub>2</sub>]<sup>-</sup> (**4**)

| -----  |        |        |                         |          |           |  |
|--------|--------|--------|-------------------------|----------|-----------|--|
| Center | Atomic | Atomic | Coordinates (Angstroms) |          |           |  |
| Number | Number | Type   | X                       | Y        | Z         |  |
| -----  |        |        |                         |          |           |  |
| 1      | 26     | 0      | 5.858994                | 2.503805 | 13.683924 |  |
| 2      | 17     | 0      | 3.425241                | 2.770743 | 13.534278 |  |
| 3      | 17     | 0      | 5.918638                | 0.717216 | 15.416527 |  |
| 4      | 8      | 0      | 6.591923                | 4.275999 | 14.369901 |  |
| 5      | 6      | 0      | 7.077771                | 5.337120 | 13.837352 |  |
| 6      | 6      | 0      | 7.520210                | 6.412118 | 14.681447 |  |
| 7      | 6      | 0      | 8.098656                | 7.556756 | 14.170228 |  |
| 8      | 6      | 0      | 8.277478                | 7.725323 | 12.775945 |  |
| 9      | 6      | 0      | 7.847728                | 6.719078 | 11.930321 |  |
| 10     | 6      | 0      | 7.241892                | 5.527703 | 12.409526 |  |
| 11     | 6      | 0      | 6.791134                | 4.581727 | 11.427865 |  |
| 12     | 7      | 0      | 6.191301                | 3.451298 | 11.657250 |  |
| 13     | 6      | 0      | 5.665487                | 2.690498 | 10.603258 |  |
| 14     | 6      | 0      | 5.264203                | 3.235652 | 9.366662  |  |
| 15     | 6      | 0      | 4.638720                | 2.449843 | 8.400536  |  |
| 16     | 6      | 0      | 4.372660                | 1.101692 | 8.655709  |  |
| 17     | 6      | 0      | 4.754266                | 0.551045 | 9.880987  |  |
| 18     | 6      | 0      | 5.410602                | 1.319388 | 10.847873 |  |



|    |   |   |           |           |           |
|----|---|---|-----------|-----------|-----------|
| 19 | 7 | 0 | 5.737959  | 0.780372  | 12.144441 |
| 20 | 6 | 0 | 6.912593  | -0.126705 | 12.332741 |
| 21 | 6 | 0 | 8.209527  | 0.659402  | 12.545587 |
| 22 | 6 | 0 | 9.472655  | 0.170271  | 12.185968 |
| 23 | 6 | 0 | 10.612077 | 0.883466  | 12.563094 |
| 24 | 6 | 0 | 10.464870 | 2.058641  | 13.298702 |
| 25 | 6 | 0 | 9.171438  | 2.472110  | 13.621733 |
| 26 | 7 | 0 | 8.080014  | 1.793981  | 13.252874 |
| 27 | 6 | 0 | 7.004320  | -1.283244 | 11.347033 |
| 28 | 6 | 0 | 7.469835  | -1.128865 | 10.030489 |
| 29 | 6 | 0 | 7.507443  | -2.213567 | 9.151037  |
| 30 | 6 | 0 | 7.075908  | -3.476728 | 9.570254  |
| 31 | 6 | 0 | 6.608324  | -3.645043 | 10.876637 |
| 32 | 6 | 0 | 6.576058  | -2.556299 | 11.753864 |
| 33 | 1 | 0 | 7.378711  | 6.277931  | 15.750675 |
| 34 | 1 | 0 | 8.420260  | 8.343549  | 14.851599 |
| 35 | 1 | 0 | 8.732816  | 8.629330  | 12.379823 |
| 36 | 1 | 0 | 7.963013  | 6.835042  | 10.852265 |
| 37 | 1 | 0 | 6.988614  | 4.881679  | 10.389130 |
| 38 | 1 | 0 | 5.380254  | 4.300215  | 9.188700  |
| 39 | 1 | 0 | 4.321689  | 2.903255  | 7.463671  |
| 40 | 1 | 0 | 3.853778  | 0.490722  | 7.921185  |
| 41 | 1 | 0 | 4.529482  | -0.488243 | 10.102220 |

|           |          |          |                 |                  |                  |
|-----------|----------|----------|-----------------|------------------|------------------|
| 42        | 1        | 0        | 4.914122        | 0.341123         | 12.555782        |
| 43        | 1        | 0        | 6.711595        | -0.546163        | 13.328687        |
| 44        | 1        | 0        | 9.565321        | -0.756252        | 11.630820        |
| 45        | 1        | 0        | 11.599440       | 0.517447         | 12.290254        |
| 46        | 1        | 0        | 11.322802       | 2.641933         | 13.621052        |
| 47        | 1        | 0        | 8.988372        | 3.370836         | 14.203309        |
| 48        | 1        | 0        | 7.801235        | -0.152120        | 9.689480         |
| 49        | 1        | 0        | 7.867950        | -2.069760        | 8.134901         |
| 50        | 1        | 0        | 7.103916        | -4.320514        | 8.884426         |
| 51        | 1        | 0        | 6.270684        | -4.621748        | 11.215762        |
| <u>52</u> | <u>1</u> | <u>0</u> | <u>6.212053</u> | <u>-2.692052</u> | <u>12.770265</u> |

**Table S12** Gas phase optimized coordinates of *cis*-[Co<sup>II</sup>(L<sub>3</sub>H)Cl<sub>2</sub>]<sup>-</sup>

-----

| Center | Atomic | Atomic | Coordinates (Angstroms) |          |           |
|--------|--------|--------|-------------------------|----------|-----------|
| Number | Number | Type   | X                       | Y        | Z         |
| 1      | 17     | 0      | 3.577013                | 2.826417 | 13.437141 |
| 2      | 17     | 0      | 6.057223                | 0.836687 | 15.424386 |
| 3      | 8      | 0      | 6.794067                | 4.201489 | 14.400434 |
| 4      | 6      | 0      | 7.129545                | 5.323995 | 13.881343 |
| 5      | 6      | 0      | 7.539976                | 6.398191 | 14.745138 |
| 6      | 6      | 0      | 7.980928                | 7.610888 | 14.255299 |

-----

|    |   |   |           |           |           |
|----|---|---|-----------|-----------|-----------|
| 7  | 6 | 0 | 8.046003  | 7.857317  | 12.862865 |
| 8  | 6 | 0 | 7.642248  | 6.855174  | 11.999608 |
| 9  | 6 | 0 | 7.171517  | 5.595482  | 12.455884 |
| 10 | 6 | 0 | 6.734900  | 4.667332  | 11.449077 |
| 11 | 7 | 0 | 6.220641  | 3.491543  | 11.642229 |
| 12 | 6 | 0 | 5.717180  | 2.730357  | 10.576999 |
| 13 | 6 | 0 | 5.330305  | 3.269764  | 9.332829  |
| 14 | 6 | 0 | 4.737455  | 2.477468  | 8.352502  |
| 15 | 6 | 0 | 4.487345  | 1.124464  | 8.598490  |
| 16 | 6 | 0 | 4.853217  | 0.577736  | 9.829811  |
| 17 | 6 | 0 | 5.481613  | 1.351844  | 10.811295 |
| 18 | 7 | 0 | 5.789576  | 0.808976  | 12.112942 |
| 19 | 6 | 0 | 6.924823  | -0.138615 | 12.317569 |
| 20 | 6 | 0 | 8.245950  | 0.611051  | 12.502540 |
| 21 | 6 | 0 | 9.496363  | 0.063603  | 12.185353 |
| 22 | 6 | 0 | 10.652313 | 0.763670  | 12.534852 |
| 23 | 6 | 0 | 10.533212 | 1.983449  | 13.200131 |
| 24 | 6 | 0 | 9.250117  | 2.452838  | 13.485835 |
| 25 | 7 | 0 | 8.143982  | 1.785401  | 13.142982 |
| 26 | 6 | 0 | 6.975730  | -1.323312 | 11.361967 |
| 27 | 6 | 0 | 7.473810  | -1.226781 | 10.051880 |
| 28 | 6 | 0 | 7.475128  | -2.334782 | 9.201115  |
| 29 | 6 | 0 | 6.975317  | -3.564427 | 9.643599  |

|    |    |   |           |           |           |
|----|----|---|-----------|-----------|-----------|
| 30 | 6  | 0 | 6.475893  | -3.675424 | 10.944315 |
| 31 | 6  | 0 | 6.479525  | -2.563448 | 11.792507 |
| 32 | 1  | 0 | 7.488336  | 6.203643  | 15.813196 |
| 33 | 1  | 0 | 8.282664  | 8.391249  | 14.953169 |
| 34 | 1  | 0 | 8.395233  | 8.813905  | 12.482864 |
| 35 | 1  | 0 | 7.670581  | 7.029132  | 10.923495 |
| 36 | 1  | 0 | 6.862574  | 5.036004  | 10.421785 |
| 37 | 1  | 0 | 5.436061  | 4.334952  | 9.153278  |
| 38 | 1  | 0 | 4.433711  | 2.928660  | 7.410104  |
| 39 | 1  | 0 | 3.992324  | 0.507316  | 7.852715  |
| 40 | 1  | 0 | 4.636264  | -0.464126 | 10.044903 |
| 41 | 1  | 0 | 4.946423  | 0.420109  | 12.535908 |
| 42 | 1  | 0 | 6.714691  | -0.524395 | 13.325744 |
| 43 | 1  | 0 | 9.565993  | -0.895463 | 11.684588 |
| 44 | 1  | 0 | 11.631134 | 0.353900  | 12.295302 |
| 45 | 1  | 0 | 11.405600 | 2.557906  | 13.498685 |
| 46 | 1  | 0 | 9.083683  | 3.384520  | 14.017953 |
| 47 | 1  | 0 | 7.859046  | -0.276650 | 9.692507  |
| 48 | 1  | 0 | 7.861463  | -2.235302 | 8.189127  |
| 49 | 1  | 0 | 6.975876  | -4.426579 | 8.980416  |
| 50 | 1  | 0 | 6.086168  | -4.625813 | 11.301855 |
| 51 | 1  | 0 | 6.091966  | -2.655173 | 12.805132 |
| 52 | 27 | 0 | 5.963323  | 2.504866  | 13.632401 |
